# Supplementary material for: Identity Disclosure and Anthropomorphism in Voice Chatbot Design: A Field Experiment
Source: Atypon-hosted journal article supplement (doi:10.1287/mnsc.2022.03833), 2024-08-26
Supplement: mnsc.2022.03833.sm1.pdf [file mnsc.2022.03833.sm1.pdf]

# Online Appendix to “Identity Disclosure and Anthropomorphism in Voice Chatbot Design: A Field Experiment” (Yuqian Xu, Hongyan Dai, and Wanfeng Yan)

## Appendix A: Post-Experiment Effects

In addition to our main analyses, we seek to examine the post-experiment effects of our proposed anthropomorphism improvement solutions after the focal platform implemented them. To achieve this, we engaged in several rounds of discussion with the company and were able to randomly select 1,000 drivers from the entire driver population to examine their behavioral changes after the implementation. We obtained access to their phone call records with our focal platform, and among these 1,000 drivers, 572 had received outbound calls made by the chatbot both before and after the implementation of the solutions until December 14th, 2022. We then conducted a before-after analysis ( $AfterImp = 1$  if the period is after the implementation) using data from these 572 drivers, excluding the period of our experiment, to eliminate the potential impact of different treatment conditions. The results, presented in Table EC.1, once again demonstrate positive effects on the response rate and order acceptance intention, indicating the potential presence of post-experiment effects of our proposed anthropomorphism improvement solutions.

**Table EC.1 Post-Experiment Effects**

|                | <i>response</i>     |                      |                       | <i>length</i>      | <i>intention</i>    |                      |                      |
|----------------|---------------------|----------------------|-----------------------|--------------------|---------------------|----------------------|----------------------|
|                | Logit               | Probit               | LPM                   | OLS                | Logit               | Probit               | LPM                  |
| AfterImp       | 0.634***<br>(0.179) | 0.341***<br>(0.0936) | 0.0681***<br>(0.0195) | 0.0360<br>(0.0562) | 0.515***<br>(0.116) | 0.321***<br>(0.0716) | 0.124***<br>(0.0276) |
| Controls       | Yes                 | Yes                  | Yes                   | Yes                | Yes                 | Yes                  | Yes                  |
| $N$            | 1,540               | 1,540                | 1,540                 | 1,540              | 1,537               | 1,537                | 1,540                |
| (Pseudo) $R^2$ | 0.028               | 0.028                | 0.022                 | 0.019              | 0.037               | 0.037                | 0.050                |

Standard errors are given in parentheses.

\*\*\*  $p < 0.001$ , \*\*  $p < 0.01$ , \*  $p < 0.05$

## Appendix B: Figures and Tables

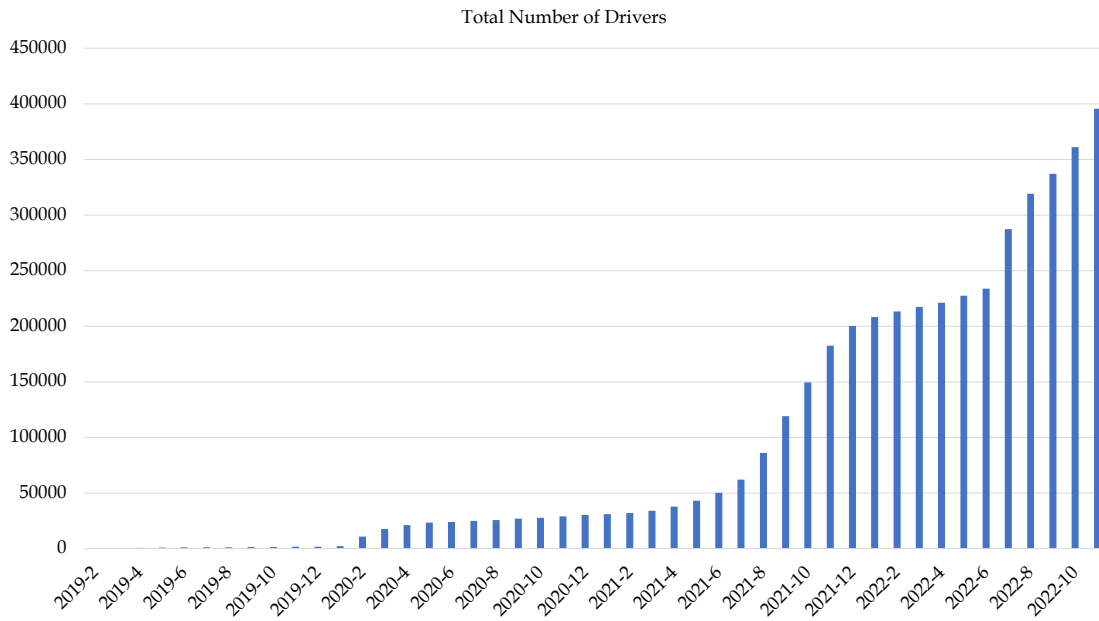

**Figure EC.1** Total Number of Drivers

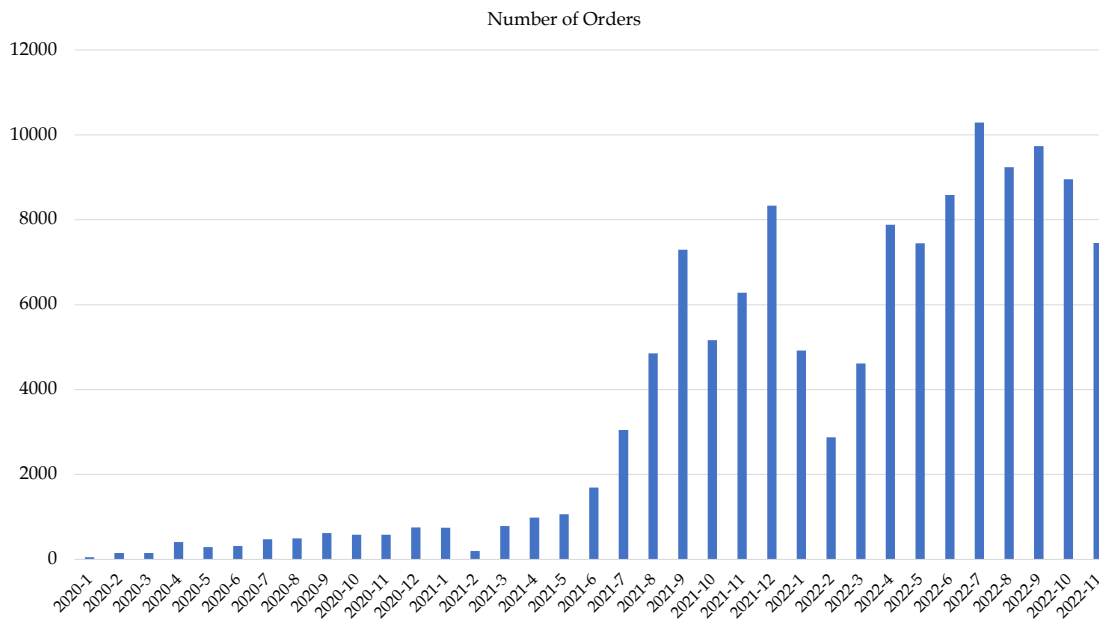

**Figure EC.2** Number of Orders

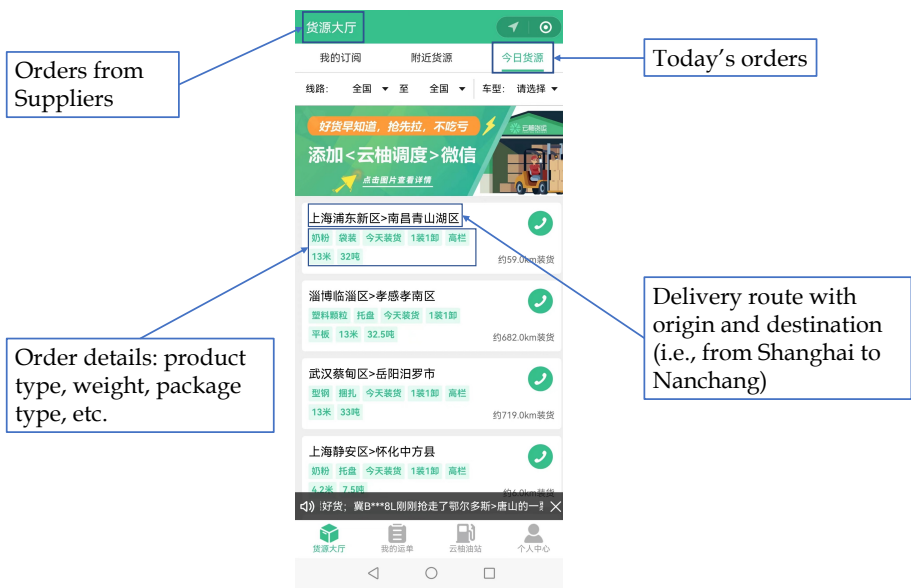

**Figure EC.3** Sample YunYou Freight App Page

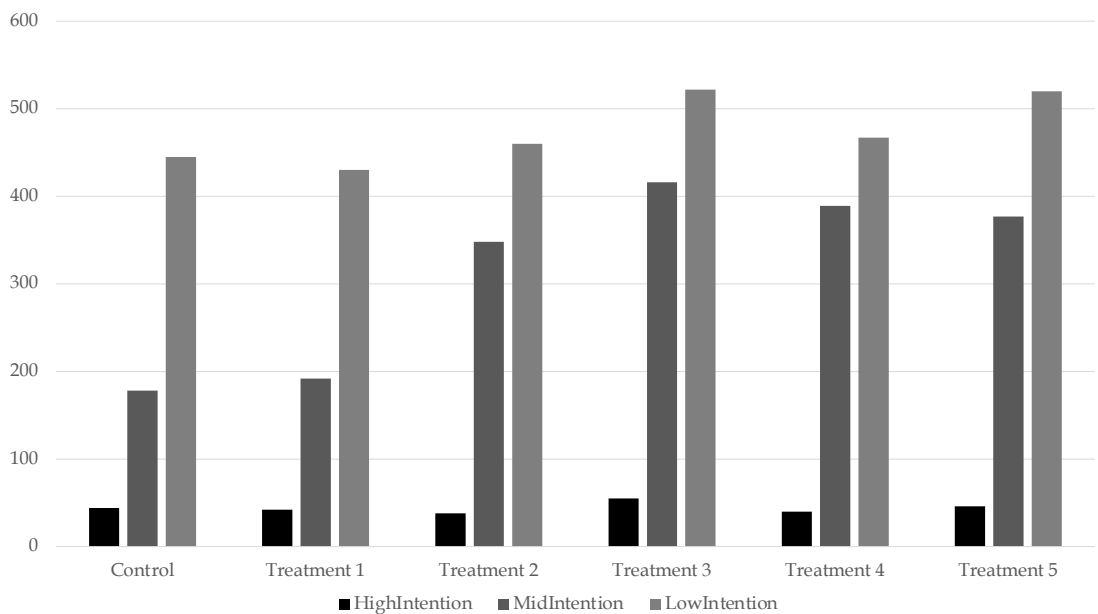

**Figure EC.4** Intention Distribution

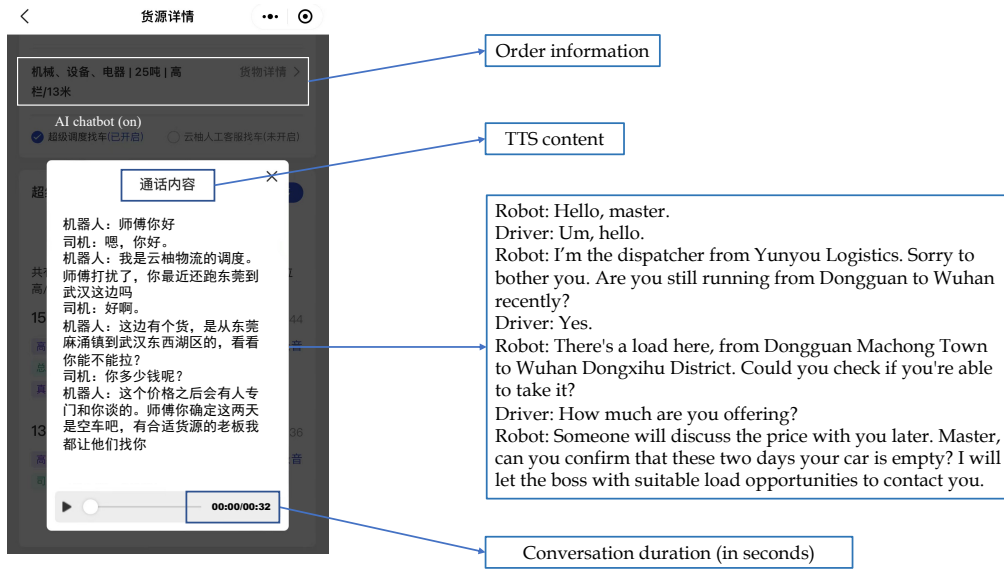

Figure EC.5 Sample Recording in the Control Group

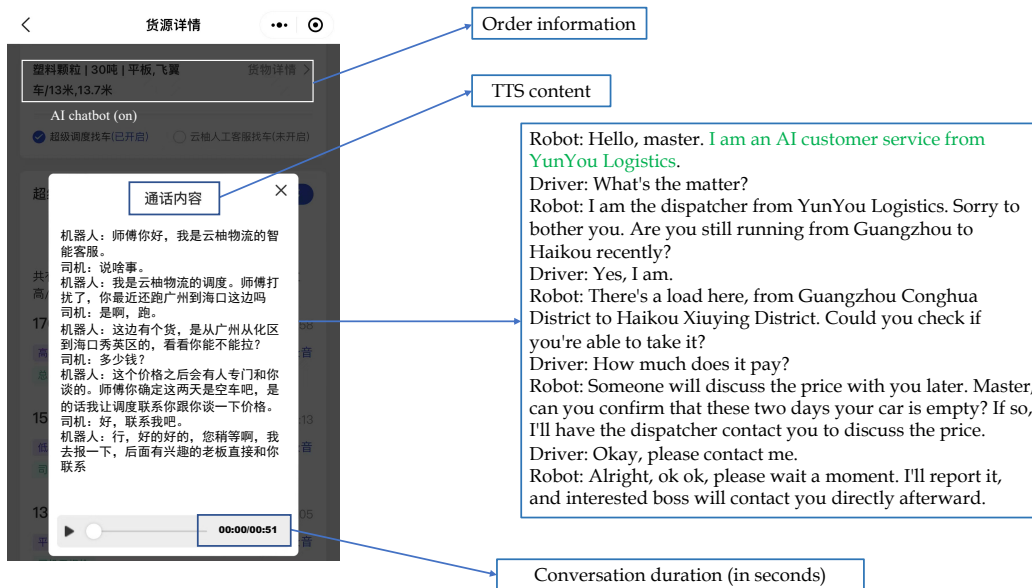

Figure EC.6 Sample Recording in the Treatment 1 Group

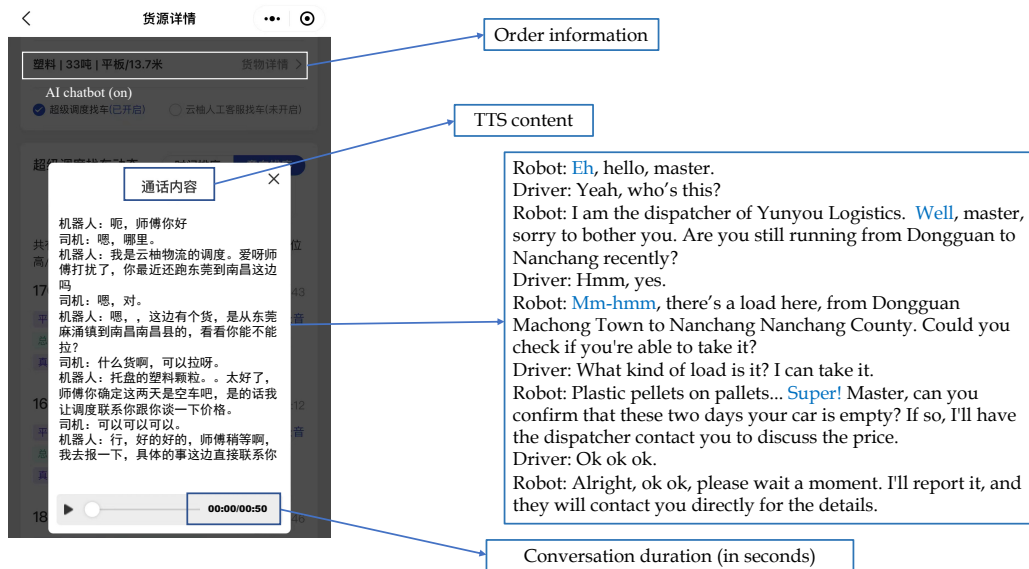

**Figure EC.7 Sample Recording in the Treatment 2 Group**

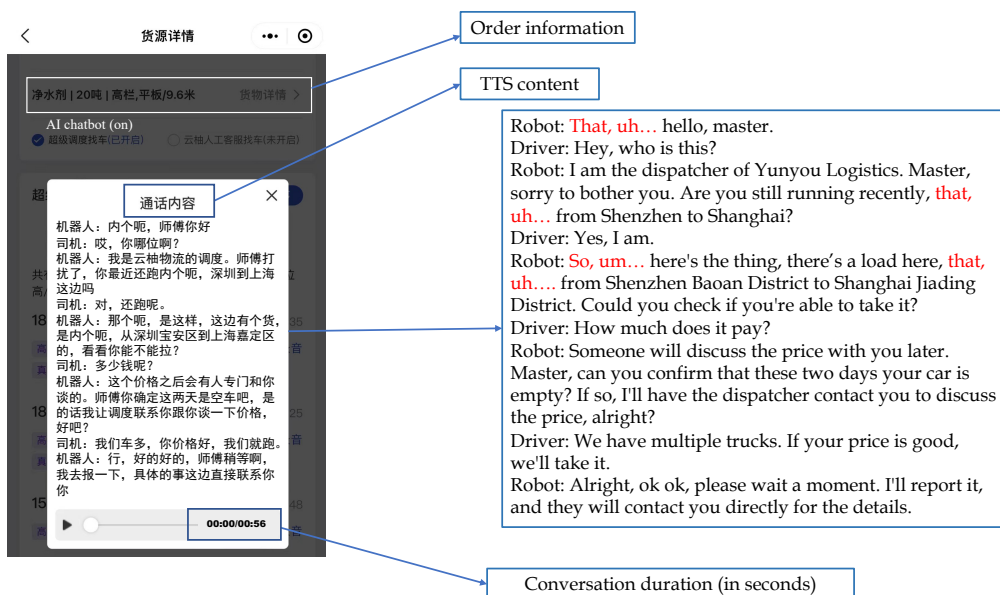

**Figure EC.8 Sample Recording in the Treatment 3 Group**

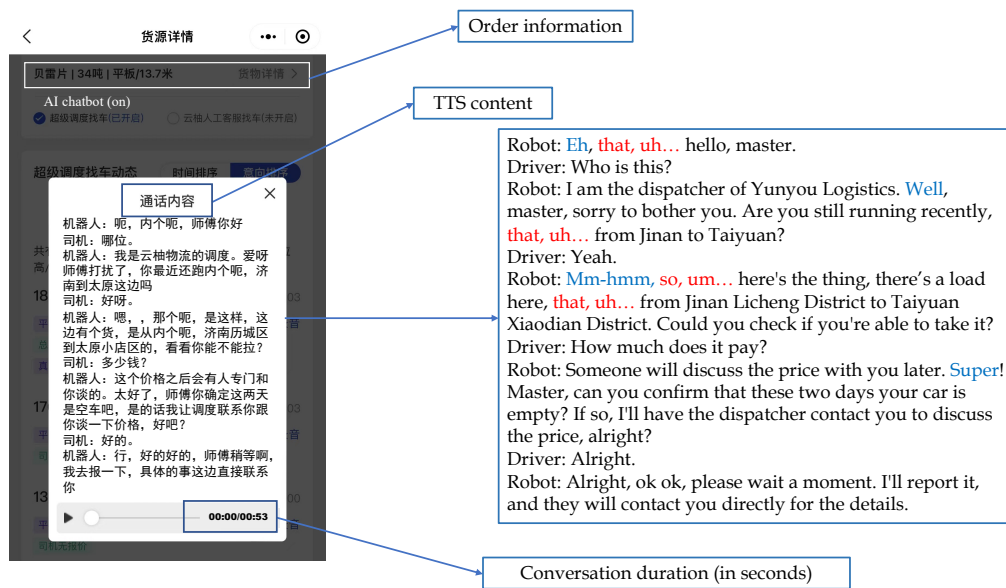

Figure EC.9 Sample Recording in the Treatment 4 Group

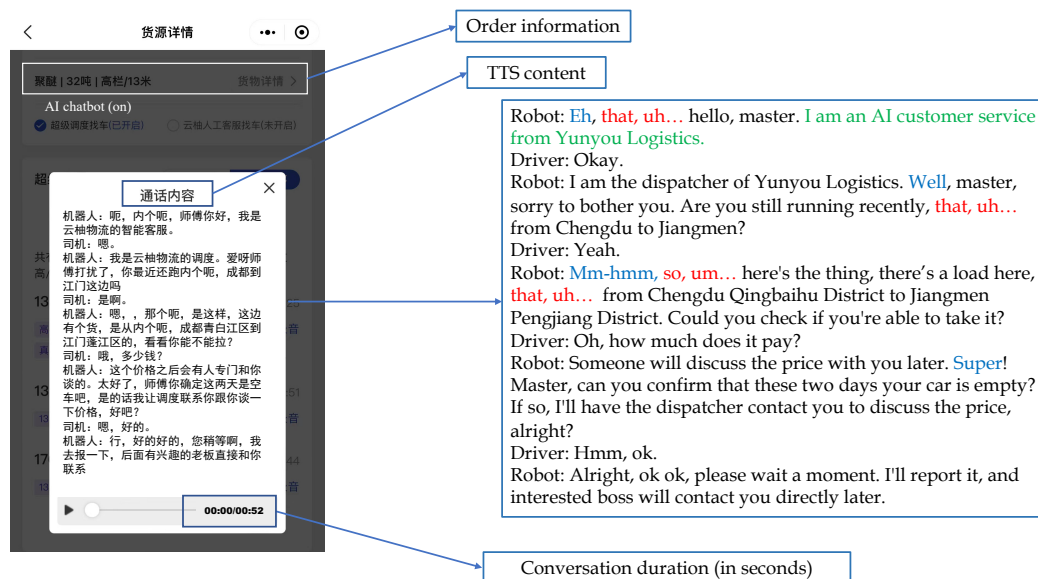

Figure EC.10 Sample Recording in the Treatment 5 Group

The screenshot shows a mobile application interface for a voice chatbot. At the top, it says '货源详情' (Source Details) and '机械、设备、电器 | 25吨 | 高栏/13米' (Machinery, Equipment, Electrical | 25 tons | High Rack/13m). Below this, there's a section for 'AI chatbot (on)' with options for '超级调度找车(已开启)' (Super Scheduling Find Car (On)) and '云轴人工客服找车(未开启)' (Cloud Axis人工客服找车 (Off)). A '通话内容' (Call Content) window is open, displaying a transcript of the conversation. A play button and a timer showing '00:00/00:32' are at the bottom of the transcript. Annotations with arrows point from the transcript to a larger text box on the right, which contains the TTS content of the conversation. The annotations are: 'Order information' pointing to the top header, 'TTS content' pointing to the transcript, 'To change the topic' pointing to the word 'Huh' in the transcript, and 'Conversation duration (in seconds)' pointing to the timer.

**Order information**

**TTS content**

Robot: Eh, that, uh... hello, master.  
 Driver: Hello.  
 Robot: I am the dispatcher of Yunyou Logistics. Well, master, sorry to bother you. Are you still running recently, that, uh... from Shijiazhuang to Guangzhou?  
 Driver: No, I have not.  
 Robot: Well, there was a, that, uh... load from Shijiazhuang Yuanshi County to Guangzhou Zengcheng District that was assigned to you. In that case, where is your truck currently located?  
 Driver: My truck is currently in Hebei.  
 Robot: **Huh**, master, are you currently driving with an empty truck?  
 Driver: I'm not running with empty truck; I have a load.  
 Robot: **Huh**, then where is your shipment headed to?  
 Driver: My shipment is going to Tianjin.  
 Robot: **Huh**, by the way, master, when do you expect to arrive there?  
 Driver: Today.  
 Robot: Alright, well, master, goodbye, and we will contact you if we have any shipments in the future!

**To change the topic**

**Conversation duration (in seconds)**

**Figure EC.11** Example with "Huh" to Change the Topic

请您根据刚才听到的两段对话录音，分别对A对话和B对话进行打分。

Please rate the following items for recordings A and B

\*1. 请您对音频的自然程度打分。  
假的 (1分) —— 自然的 (6分)

1 2 3 4 5 6

A ○ ○ ○ ○ ○ ○

B ○ ○ ○ ○ ○ ○

1. Please rate the naturalness: fake (1) natural (6)

\*2. 您觉得音频是人类对话还是机器人与人类的对话。  
机器人的 (1分) —— 人类的 (6分)

1 2 3 4 5 6

A ○ ○ ○ ○ ○ ○

B ○ ○ ○ ○ ○ ○

2. Please rate if the conversation is human-like: machine-like (1) human-like (6)

\*3. 音频中的调度客服是否存在意识?  
无意识的 (1分) —— 有意识的 (6分)

1 2 3 4 5 6

A ○ ○ ○ ○ ○ ○

B ○ ○ ○ ○ ○ ○

3. Please rate how conscious the agent is: unconscious (1) conscious (6)

4. Please rate how real the agent is: artificial (1) lifelike (6)

5. Please rate the content of the conversation: rigidly (1) elegantly (6)

\*4. 您觉得对话是否为人工合成的?  
人工合成的 (1分) —— 真实的 (6分)

1 2 3 4 5 6

A ○ ○ ○ ○ ○ ○

B ○ ○ ○ ○ ○ ○

\*5. 请您对对话的内容打分。  
内容僵硬 (1分) —— 内容流畅 (6分)

1 2 3 4 5 6

A ○ ○ ○ ○ ○ ○

B ○ ○ ○ ○ ○ ○

4. Please rate the content of the conversation: rigidly (1) elegantly (6)

Figure EC.12 Sample Survey

**Table EC.2** Trend of Drivers and Orders

| Month   | 2020-1  | 2020-2  | 2020-3  | 2020-4  | 2020-5  | 2020-6  | 2020-7  |
|---------|---------|---------|---------|---------|---------|---------|---------|
| drivers | 2098    | 10631   | 17509   | 21020   | 23353   | 23968   | 24782   |
| orders  | 49      | 154     | 151     | 409     | 293     | 316     | 477     |
| Month   | 2020-8  | 2020-9  | 2020-10 | 2020-11 | 2020-12 | 2021-1  | 2021-2  |
| drivers | 25716   | 26832   | 27740   | 28829   | 30103   | 31000   | 31863   |
| orders  | 492     | 622     | 579     | 580     | 750     | 744     | 197     |
| Month   | 2021-3  | 2021-4  | 2021-5  | 2021-6  | 2021-7  | 2021-8  | 2021-9  |
| drivers | 34080   | 37815   | 42972   | 50120   | 61889   | 86107   | 118985  |
| orders  | 783     | 986     | 1067    | 1694    | 3051    | 4852    | 7296    |
| Month   | 2021-10 | 2021-11 | 2021-12 | 2022-1  | 2022-2  | 2022-3  | 2022-4  |
| drivers | 149409  | 182435  | 200245  | 208178  | 213259  | 217275  | 221051  |
| orders  | 5166    | 6284    | 8333    | 4922    | 2877    | 4616    | 7883    |
| Month   | 2022-5  | 2022-6  | 2022-7  | 2022-8  | 2022-9  | 2022-10 | 2022-11 |
| drivers | 227459  | 233814  | 287282  | 319164  | 336969  | 360891  | 395484  |
| orders  | 7446    | 8582    | 10289   | 9237    | 9738    | 8956    | 7450    |

*Notes.* 1. This table presents the total number of registered drivers, while only around 1/4th of these drivers are active users engaged in our focal platform.  
 2. Given the potential demand-supply mismatch in this business context, our focal platform usually assigns a single order to approximately 10 drivers to increase the likelihood of finding a suitable match among them. To enable this dispatching process, our focal platform always strives to expand the pool of available drivers, even when the number of available orders is relatively smaller. As a result, we always see more drivers than orders.

**Table EC.3** Mapping between the English and Chinese Characters

| Interjections (English)                      | Chinese Characters            |
|----------------------------------------------|-------------------------------|
| super; yes; well; eh; mm-hmm; gosh; alas; uh | 太好了; 对呀; 爱呀; 呃; 嗯。。; 哎呀; 唉; 唔 |
| Filler Words (English)                       | Chinese Characters            |
| so, um; that, uh; hmm; then; huh             | 那个呃; 内个呃; 哼; 那么; 咦            |

**Table EC.4 Full Results of the Main Estimation**

|                                           | <i>response</i> |           |            | <i>length</i> | <i>intention</i> |            |            |
|-------------------------------------------|-----------------|-----------|------------|---------------|------------------|------------|------------|
|                                           | Logit           | Probit    | LPM        | OLS           | Logit            | Probit     | LPM        |
| Treatment 1:                              | -0.704***       | -0.402*** | -0.111***  | 0.0128        | 0.0345           | 0.0218     | 0.00814    |
| Chatbot Identity Disclosure               | (0.0859)        | (0.0485)  | (0.0110)   | (0.0334)      | (0.0692)         | (0.0427)   | (0.0165)   |
| Treatment 2:                              | 0.546***        | 0.285***  | 0.0561***  | 0.0375        | 0.418***         | 0.260***   | 0.101***   |
| Interjections                             | (0.106)         | (0.0552)  | (0.0109)   | (0.0332)      | (0.0679)         | (0.0422)   | (0.0164)   |
| Treatment 3:                              | 0.770***        | 0.398***  | 0.0726***  | 0.112***      | 0.807***         | 0.504***   | 0.197***   |
| Fillers                                   | (0.113)         | (0.0577)  | (0.0110)   | (0.0335)      | (0.0686)         | (0.0426)   | (0.0165)   |
| Treatment 4:                              | 0.770***        | 0.394***  | 0.0728***  | 0.121***      | 0.548***         | 0.341***   | 0.133***   |
| Interjections and Fillers                 | (0.112)         | (0.0573)  | (0.0109)   | (0.0333)      | (0.0680)         | (0.0422)   | (0.0164)   |
| Treatment 5:                              | 0.147           | 0.0787    | 0.0175     | 0.0718*       | 0.615***         | 0.383***   | 0.150***   |
| Interjections, Fillers,<br>and Disclosure | (0.0966)        | (0.0521)  | (0.0109)   | (0.0331)      | (0.0677)         | (0.0421)   | (0.0164)   |
| hist_call                                 | -0.0722**       | -0.0402** | -0.00921** | -0.0155       | -0.0608**        | -0.0367**  | -0.0145**  |
|                                           | (0.0272)        | (0.0153)  | (0.00334)  | (0.0101)      | (0.0212)         | (0.0128)   | (0.00501)  |
| flat                                      | 0.197           | 0.101     | 0.0210     | 0.0283        | 0.138*           | 0.0867*    | 0.0338*    |
|                                           | (0.107)         | (0.0570)  | (0.0113)   | (0.0344)      | (0.0699)         | (0.0435)   | (0.0170)   |
| van                                       | 0.00937         | 0.00560   | 0.00170    | 0.127**       | 0.155            | 0.0971     | 0.0374     |
|                                           | (0.142)         | (0.0768)  | (0.0157)   | (0.0477)      | (0.0974)         | (0.0605)   | (0.0235)   |
| low                                       | -0.00554        | -0.00242  | -0.000838  | 0.00952       | 0.0593           | 0.0373     | 0.0145     |
|                                           | (0.139)         | (0.0756)  | (0.0155)   | (0.0472)      | (0.0956)         | (0.0598)   | (0.0233)   |
| truck_size                                | 0.103*          | 0.0557*   | 0.0102*    | -0.0193       | 0.0504           | 0.0313     | 0.0123     |
|                                           | (0.0483)        | (0.0256)  | (0.00500)  | (0.0152)      | (0.0309)         | (0.0192)   | (0.00750)  |
| pro_F                                     | 0.114           | 0.0520    | 0.0109     | 0.00320       | -0.00950         | -0.00583   | -0.00239   |
|                                           | (0.155)         | (0.0800)  | (0.0150)   | (0.0455)      | (0.0923)         | (0.0575)   | (0.0225)   |
| prod_weight                               | -0.0728         | -0.0385   | -0.00689   | 0.0405+       | 0.0792           | 0.0489     | 0.0189     |
|                                           | (0.0686)        | (0.0370)  | (0.00749)  | (0.0228)      | (0.0466)         | (0.0289)   | (0.0113)   |
| distance                                  | -0.0172         | -0.0110   | -0.00185   | -0.0107       | -0.0792***       | -0.0491*** | -0.0192*** |
|                                           | (0.0302)        | (0.0162)  | (0.00326)  | (0.00993)     | (0.0203)         | (0.0126)   | (0.00490)  |
| Constant                                  | 1.743***        | 1.042***  | 0.850***   | -0.106***     | -0.600***        | -0.374***  | 0.354***   |
|                                           | (0.0840)        | (0.0457)  | (0.00954)  | (0.0290)      | (0.0601)         | (0.0371)   | (0.0143)   |
| <i>N</i>                                  | 10,703          | 10,703    | 10,703     | 10,703        | 10,703           | 10,703     | 10,703     |
| (Pseudo) $R^2$                            | 0.047           | 0.047     | 0.039      | 0.004         | 0.019            | 0.019      | 0.026      |

*Note.* The dummy variables *pro\_P* and *pac\_T* were dropped due to multicollinearity.

Standard errors are given in parentheses.

\*\*\*  $p < 0.001$ , \*\*  $p < 0.01$ , \*  $p < 0.05$

**Table EC.5** Pair-Wise Comparison between Treatments 3 and 2

|                                | <i>response32</i>   |                      |                        | <i>length32</i>       | <i>intention32</i>    |                       |                        |
|--------------------------------|---------------------|----------------------|------------------------|-----------------------|-----------------------|-----------------------|------------------------|
|                                | Logit               | Probit               | LPM                    | OLS                   | Logit                 | Probit                | LPM                    |
| Treatment 32:                  | 0.224<br>(0.124)    | 0.114<br>(0.0615)    | 0.0168<br>(0.00923)    | 0.0754***<br>(0.0163) | 0.390***<br>(0.0680)  | 0.244***<br>(0.0424)  | 0.0964***<br>(0.0167)  |
| hist_call                      | -0.0727<br>(0.0578) | -0.0374<br>(0.0312)  | -0.00673<br>(0.00516)  | -0.0201*<br>(0.00912) | -0.111**<br>(0.0395)  | -0.0675**<br>(0.0236) | -0.0269**<br>(0.00934) |
| flat                           | -0.105<br>(0.201)   | -0.0483<br>(0.102)   | -0.00845<br>(0.0160)   | 0.0373<br>(0.0283)    | 0.0989<br>(0.118)     | 0.0624<br>(0.0737)    | 0.0245<br>(0.0290)     |
| van                            | -0.0502<br>(0.291)  | -0.0173<br>(0.147)   | -0.00297<br>(0.0228)   | 0.0471<br>(0.0403)    | 0.175<br>(0.168)      | 0.110<br>(0.105)      | 0.0434<br>(0.0413)     |
| low                            | 0.178<br>(0.317)    | 0.0905<br>(0.155)    | 0.0125<br>(0.0226)     | 0.0481<br>(0.0399)    | 0.173<br>(0.167)      | 0.109<br>(0.104)      | 0.0425<br>(0.0409)     |
| truck_size                     | 0.224*<br>(0.105)   | 0.109*<br>(0.0510)   | 0.0148*<br>(0.00727)   | 0.0215<br>(0.0128)    | 0.0513<br>(0.0536)    | 0.0317<br>(0.0334)    | 0.0126<br>(0.0132)     |
| pro_F                          | 0.101<br>(0.366)    | 0.0404<br>(0.169)    | 0.00517<br>(0.0221)    | -0.0236<br>(0.0390)   | 0.0275<br>(0.163)     | 0.0176<br>(0.102)     | 0.00670<br>(0.0399)    |
| prod_weight                    | -0.119<br>(0.143)   | -0.0555<br>(0.0715)  | -0.00697<br>(0.0109)   | 0.0236<br>(0.0193)    | 0.0751<br>(0.0803)    | 0.0468<br>(0.0501)    | 0.0185<br>(0.0197)     |
| distance                       | -0.123*<br>(0.0599) | -0.0608*<br>(0.0303) | -0.00972*<br>(0.00472) | -0.0204*<br>(0.00834) | -0.0932**<br>(0.0349) | -0.0579**<br>(0.0217) | -0.0229**<br>(0.00854) |
| Constant                       | 2.349***<br>(0.137) | 1.352***<br>(0.0687) | 0.910***<br>(0.0105)   | -0.0429*<br>(0.0186)  | -0.194*<br>(0.0775)   | -0.121*<br>(0.0484)   | 0.452***<br>(0.0191)   |
| <i>N</i>                       | 3,532               | 3,532                | 3,532                  | 3,532                 | 3,532                 | 3,532                 | 3,532                  |
| (Pseudo) <i>R</i> <sup>2</sup> | 0.011               | 0.011                | 0.006                  | 0.014                 | 0.012                 | 0.012                 | 0.017                  |

*Note.* The dummy variables *pro\_P* and *pac\_T* were dropped due to multicollinearity. Standard errors are given in parentheses.

\*\*\* p<0.001, \*\* p<0.01, \* p<0.05

**Table EC.6** Pair-Wise Comparison between Treatments 4 and 2

|                                | <i>response42</i>   |                      |                       | <i>length42</i>      | <i>intention42</i>   |                      |                       |
|--------------------------------|---------------------|----------------------|-----------------------|----------------------|----------------------|----------------------|-----------------------|
|                                | Logit               | Probit               | LPM                   | OLS                  | Logit                | Probit               | LPM                   |
| Treatment 42:                  | 0.225<br>(0.123)    | 0.112<br>(0.0610)    | 0.0169<br>(0.00921)   | 0.0841*<br>(0.0394)  | 0.129<br>(0.0673)    | 0.0808<br>(0.0421)   | 0.0321<br>(0.0167)    |
| hist_call                      | -0.0525<br>(0.0587) | -0.0260<br>(0.0306)  | -0.00457<br>(0.00499) | -0.0106<br>(0.0214)  | -0.0664<br>(0.0371)  | -0.0412<br>(0.0230)  | -0.0163<br>(0.00907)  |
| flat                           | -0.134<br>(0.204)   | -0.0634<br>(0.104)   | -0.0111<br>(0.0163)   | 0.0245<br>(0.0698)   | -0.0802<br>(0.119)   | -0.0500<br>(0.0746)  | -0.0198<br>(0.0296)   |
| van                            | -0.258<br>(0.310)   | -0.128<br>(0.153)    | -0.0193<br>(0.0228)   | 0.148<br>(0.0977)    | 0.00603<br>(0.167)   | 0.00396<br>(0.105)   | 0.00159<br>(0.0415)   |
| low                            | 0.227<br>(0.316)    | 0.113<br>(0.153)     | 0.0153<br>(0.0219)    | 0.0279<br>(0.0937)   | 0.137<br>(0.160)     | 0.0858<br>(0.100)    | 0.0342<br>(0.0398)    |
| truck_size                     | 0.119<br>(0.0995)   | 0.0592<br>(0.0490)   | 0.00868<br>(0.00726)  | -0.0420<br>(0.0311)  | 0.0859<br>(0.0531)   | 0.0537<br>(0.0332)   | 0.0213<br>(0.0132)    |
| pro_F                          | -0.243<br>(0.296)   | -0.127<br>(0.147)    | -0.0173<br>(0.0223)   | -0.0241<br>(0.0953)  | -0.121<br>(0.162)    | -0.0760<br>(0.102)   | -0.0302<br>(0.0404)   |
| prod_weight                    | -0.160<br>(0.149)   | -0.0803<br>(0.0734)  | -0.0116<br>(0.0109)   | 0.0483<br>(0.0467)   | 0.0559<br>(0.0798)   | 0.0350<br>(0.0499)   | 0.0139<br>(0.0198)    |
| distance                       | -0.107<br>(0.0594)  | -0.0521<br>(0.0299)  | -0.00831<br>(0.00466) | -0.00222<br>(0.0200) | -0.0875*<br>(0.0343) | -0.0546*<br>(0.0214) | -0.0216*<br>(0.00847) |
| Constant                       | 2.420***<br>(0.142) | 1.393***<br>(0.0702) | 0.917***<br>(0.0105)  | -0.0746<br>(0.0451)  | -0.106<br>(0.0771)   | -0.0664<br>(0.0482)  | 0.474***<br>(0.0191)  |
| <i>N</i>                       | 3,564               | 3,564                | 3,564                 | 3,564                | 3,564                | 3,564                | 3,564                 |
| (Pseudo) <i>R</i> <sup>2</sup> | 0.005               | 0.005                | 0.003                 | 0.002                | 0.005                | 0.005                | 0.006                 |

*Note.* The dummy variables *pro\_P* and *pac\_T* were dropped due to multicollinearity. Standard errors are given in parentheses.

\*\*\* p<0.001, \*\* p<0.01, \* p<0.05

**Table EC.7** Pair-Wise Comparison between Treatments 5 and 2

|                | <i>response52</i>    |                       |                        | <i>length52</i>        | <i>intention52</i>    |                       |                        |
|----------------|----------------------|-----------------------|------------------------|------------------------|-----------------------|-----------------------|------------------------|
|                | Logit                | Probit                | LPM                    | OLS                    | Logit                 | Probit                | LPM                    |
| Treatment 52:  | -0.399***<br>(0.109) | -0.206***<br>(0.0563) | -0.0384***<br>(0.0104) | 0.0361*<br>(0.0168)    | 0.202**<br>(0.0671)   | 0.126**<br>(0.0420)   | 0.0500**<br>(0.0167)   |
| hist_call      | -0.0875<br>(0.0512)  | -0.0481<br>(0.0283)   | -0.00964<br>(0.00568)  | -0.0127<br>(0.00916)   | -0.0969*<br>(0.0376)  | -0.0604**<br>(0.0233) | -0.0237**<br>(0.00907) |
| flat           | 0.142<br>(0.196)     | 0.0683<br>(0.100)     | 0.0127<br>(0.0182)     | 0.0288<br>(0.0294)     | 0.0984<br>(0.117)     | 0.0614<br>(0.0734)    | 0.0246<br>(0.0291)     |
| van            | 0.114<br>(0.252)     | 0.0562<br>(0.134)     | 0.0124<br>(0.0259)     | -0.000455<br>(0.0417)  | 0.172<br>(0.167)      | 0.108<br>(0.104)      | 0.0426<br>(0.0414)     |
| low            | -0.303<br>(0.248)    | -0.157<br>(0.133)     | -0.0313<br>(0.0259)    | -0.0197<br>(0.0418)    | 0.0584<br>(0.167)     | 0.0367<br>(0.104)     | 0.0146<br>(0.0414)     |
| truck_size     | 0.0640<br>(0.0839)   | 0.0341<br>(0.0437)    | 0.00612<br>(0.00818)   | 0.0166<br>(0.0132)     | 0.0475<br>(0.0527)    | 0.0297<br>(0.0330)    | 0.0118<br>(0.0131)     |
| pro_F          | 0.569<br>(0.312)     | 0.282<br>(0.151)      | 0.0418<br>(0.0247)     | 0.0420<br>(0.0398)     | -0.0779<br>(0.159)    | -0.0488<br>(0.0993)   | -0.0194<br>(0.0394)    |
| prod_weight    | 0.0810<br>(0.122)    | 0.0421<br>(0.0647)    | 0.00879<br>(0.0124)    | 0.00923<br>(0.0200)    | 0.128<br>(0.0799)     | 0.0800<br>(0.0499)    | 0.0316<br>(0.0198)     |
| distance       | -0.0630<br>(0.0524)  | -0.0341<br>(0.0273)   | -0.00612<br>(0.00522)  | -0.0274**<br>(0.00841) | -0.0996**<br>(0.0339) | -0.0621**<br>(0.0211) | -0.0246**<br>(0.00834) |
| Constant       | 2.250***<br>(0.123)  | 1.308***<br>(0.0642)  | 0.903***<br>(0.0119)   | -0.0267<br>(0.0193)    | -0.182*<br>(0.0772)   | -0.114*<br>(0.0482)   | 0.455***<br>(0.0191)   |
| <i>N</i>       | 3,599                | 3,599                 | 3,599                  | 3,599                  | 3,599                 | 3,599                 | 3,599                  |
| (Pseudo) $R^2$ | 0.012                | 0.012                 | 0.008                  | 0.007                  | 0.007                 | 0.007                 | 0.009                  |

*Note.* The dummy variables *pro\_P* and *pac\_T* were dropped due to multicollinearity.

Standard errors are given in parentheses.

\*\*\*  $p < 0.001$ , \*\*  $p < 0.01$ , \*  $p < 0.05$

**Table EC.8** Pair-Wise Comparison between Treatments 4 and 3

|                | <i>response43</i>   |                      |                        | <i>length43</i>      | <i>intention43</i>    |                       |                        |
|----------------|---------------------|----------------------|------------------------|----------------------|-----------------------|-----------------------|------------------------|
|                | Logit               | Probit               | LPM                    | OLS                  | Logit                 | Probit                | LPM                    |
| Treatment 43:  | -0.00944<br>(0.129) | -0.00707<br>(0.0634) | -0.000597<br>(0.00880) | 0.00893<br>(0.0399)  | -0.261***<br>(0.0680) | -0.163***<br>(0.0425) | -0.0644***<br>(0.0167) |
| hist_call      | 0.00530<br>(0.0661) | 0.00343<br>(0.0332)  | 0.000392<br>(0.00475)  | -0.0192<br>(0.0215)  | -0.0690<br>(0.0370)   | -0.0427<br>(0.0228)   | -0.0170<br>(0.00904)   |
| flat           | 0.0545<br>(0.223)   | 0.0293<br>(0.111)    | 0.00475<br>(0.0159)    | 0.0335<br>(0.0720)   | 0.155<br>(0.123)      | 0.0970<br>(0.0769)    | 0.0381<br>(0.0302)     |
| van            | 0.113<br>(0.326)    | 0.0532<br>(0.159)    | 0.00740<br>(0.0218)    | 0.190<br>(0.0990)    | 0.110<br>(0.168)      | 0.0693<br>(0.105)     | 0.0275<br>(0.0416)     |
| low            | 0.560<br>(0.378)    | 0.270<br>(0.175)     | 0.0346<br>(0.0220)     | 0.0788<br>(0.0996)   | 0.340*<br>(0.173)     | 0.212*<br>(0.107)     | 0.0823*<br>(0.0418)    |
| truck_size     | 0.159<br>(0.115)    | 0.0759<br>(0.0538)   | 0.00885<br>(0.00685)   | -0.0361<br>(0.0311)  | 0.0846<br>(0.0530)    | 0.0526<br>(0.0331)    | 0.0208<br>(0.0130)     |
| pro_F          | -0.578<br>(0.320)   | -0.277<br>(0.154)    | -0.0335<br>(0.0208)    | -0.0325<br>(0.0942)  | -0.0320<br>(0.161)    | -0.0194<br>(0.101)    | -0.00782<br>(0.0395)   |
| prod_weight    | -0.181<br>(0.155)   | -0.0877<br>(0.0756)  | -0.0113<br>(0.0105)    | 0.0542<br>(0.0474)   | 0.0423<br>(0.0806)    | 0.0266<br>(0.0504)    | 0.0106<br>(0.0199)     |
| distance       | -0.0758<br>(0.0674) | -0.0372<br>(0.0334)  | -0.00513<br>(0.00461)  | -0.00301<br>(0.0209) | -0.0840*<br>(0.0357)  | -0.0523*<br>(0.0222)  | -0.0207*<br>(0.00877)  |
| Constant       | 2.527***<br>(0.151) | 1.446***<br>(0.0731) | 0.924***<br>(0.0101)   | -0.0168<br>(0.0458)  | 0.211**<br>(0.0780)   | 0.132**<br>(0.0487)   | 0.552***<br>(0.0192)   |
| <i>N</i>       | 3,520               | 3,520                | 3,520                  | 3,520                | 3,520                 | 3,520                 | 3,520                  |
| (Pseudo) $R^2$ | 0.008               | 0.008                | 0.004                  | 0.002                | 0.008                 | 0.008                 | 0.011                  |

*Note.* The dummy variables *pro\_P* and *pac\_T* were dropped due to multicollinearity. Standard errors are given in parentheses.

\*\*\*  $p < 0.001$ , \*\*  $p < 0.01$ , \*  $p < 0.05$

**Table EC.9** Pair-Wise Comparison between Treatments 5 and 3

|                | <i>response53</i>    |                       |                        | <i>length53</i>         | <i>intention53</i>    |                       |                        |
|----------------|----------------------|-----------------------|------------------------|-------------------------|-----------------------|-----------------------|------------------------|
|                | Logit                | Probit                | LPM                    | OLS                     | Logit                 | Probit                | LPM                    |
| Treatment 53:  | -0.628***<br>(0.116) | -0.322***<br>(0.0588) | -0.0553***<br>(0.0101) | -0.0389*<br>(0.0170)    | -0.191**<br>(0.0679)  | -0.119**<br>(0.0423)  | -0.0469**<br>(0.0166)  |
| hist_call      | -0.0444<br>(0.0553)  | -0.0223<br>(0.0301)   | -0.00428<br>(0.00547)  | -0.0213*<br>(0.00921)   | -0.0985**<br>(0.0376) | -0.0605**<br>(0.0229) | -0.0240**<br>(0.00902) |
| flat           | 0.327<br>(0.213)     | 0.161<br>(0.107)      | 0.0280<br>(0.0179)     | 0.0339<br>(0.0302)      | 0.335**<br>(0.123)    | 0.208**<br>(0.0760)   | 0.0811**<br>(0.0296)   |
| van            | 0.384<br>(0.262)     | 0.202<br>(0.138)      | 0.0401<br>(0.0251)     | 0.0382<br>(0.0423)      | 0.273<br>(0.168)      | 0.172<br>(0.105)      | 0.0679<br>(0.0414)     |
| low            | -0.168<br>(0.271)    | -0.0780<br>(0.144)    | -0.0164<br>(0.0265)    | 0.0265<br>(0.0446)      | 0.260<br>(0.181)      | 0.163<br>(0.112)      | 0.0631<br>(0.0437)     |
| truck_size     | 0.0830<br>(0.0920)   | 0.0443<br>(0.0466)    | 0.00593<br>(0.00783)   | 0.0231<br>(0.0132)      | 0.0461<br>(0.0526)    | 0.0284<br>(0.0329)    | 0.0113<br>(0.0129)     |
| pro_F          | 0.391<br>(0.328)     | 0.179<br>(0.156)      | 0.0240<br>(0.0234)     | 0.0316<br>(0.0394)      | 0.00457<br>(0.158)    | 0.00337<br>(0.0983)   | 0.00112<br>(0.0386)    |
| prod_weight    | 0.0725<br>(0.126)    | 0.0367<br>(0.0663)    | 0.00960<br>(0.0120)    | 0.0153<br>(0.0203)      | 0.113<br>(0.0805)     | 0.0710<br>(0.0503)    | 0.0282<br>(0.0198)     |
| distance       | -0.0331<br>(0.0575)  | -0.0182<br>(0.0299)   | -0.00280<br>(0.00523)  | -0.0319***<br>(0.00880) | -0.0947**<br>(0.0352) | -0.0588**<br>(0.0219) | -0.0232**<br>(0.00862) |
| Constant       | 2.377***<br>(0.131)  | 1.368***<br>(0.0668)  | 0.909***<br>(0.0116)   | 0.0330<br>(0.0196)      | 0.138<br>(0.0779)     | 0.0859<br>(0.0486)    | 0.534***<br>(0.0192)   |
| <i>N</i>       | 3,555                | 3,555                 | 3,555                  | 3,555                   | 3,555                 | 3,555                 | 3,555                  |
| (Pseudo) $R^2$ | 0.020                | 0.020                 | 0.014                  | 0.012                   | 0.009                 | 0.009                 | 0.013                  |

*Note.* The dummy variables *pro\_P* and *pac\_T* were dropped due to multicollinearity. Standard errors are given in parentheses.

\*\*\*  $p < 0.001$ , \*\*  $p < 0.01$ , \*  $p < 0.05$

**Table EC.10** Pair-Wise Comparison between Treatments 5 and 4

|                | <i>response54</i> |           |            | <i>length54</i> | <i>intention54</i> |           |           |
|----------------|-------------------|-----------|------------|-----------------|--------------------|-----------|-----------|
|                | Logit             | Probit    | LPM        | OLS             | Logit              | Probit    | LPM       |
| Treatment 54:  | -0.623***         | -0.316*** | -0.0553*** | -0.0496         | 0.0700             | 0.0438    | 0.0174    |
|                | (0.115)           | (0.0581)  | (0.0101)   | (0.0395)        | (0.0671)           | (0.0420)  | (0.0167)  |
| hist_call      | -0.0345           | -0.0167   | -0.00317   | -0.0116         | -0.0613            | -0.0384   | -0.0152   |
|                | (0.0560)          | (0.0296)  | (0.00530)  | (0.0208)        | (0.0356)           | (0.0223)  | (0.00879) |
| flat           | 0.312             | 0.153     | 0.0266     | 0.0220          | 0.152              | 0.0948    | 0.0376    |
|                | (0.217)           | (0.109)   | (0.0183)   | (0.0718)        | (0.122)            | (0.0765)  | (0.0303)  |
| van            | 0.232             | 0.113     | 0.0216     | 0.137           | 0.106              | 0.0661    | 0.0264    |
|                | (0.273)           | (0.142)   | (0.0251)   | (0.0986)        | (0.168)            | (0.105)   | (0.0416)  |
| low            | -0.116            | -0.0489   | -0.0109    | 0.00772         | 0.220              | 0.137     | 0.0540    |
|                | (0.270)           | (0.142)   | (0.0256)   | (0.100)         | (0.172)            | (0.107)   | (0.0424)  |
| truck_size     | 0.00759           | 0.00451   | 0.000524   | -0.0391         | 0.0809             | 0.0507    | 0.0201    |
|                | (0.0891)          | (0.0455)  | (0.00782)  | (0.0307)        | (0.0521)           | (0.0326)  | (0.0130)  |
| pro_F          | 0.0358            | 0.00284   | 0.00312    | 0.0326          | -0.135             | -0.0843   | -0.0335   |
|                | (0.273)           | (0.138)   | (0.0236)   | (0.0926)        | (0.157)            | (0.0983)  | (0.0391)  |
| prod_weight    | 0.0429            | 0.0178    | 0.00427    | 0.0379          | 0.0963             | 0.0603    | 0.0240    |
|                | (0.129)           | (0.0676)  | (0.0120)   | (0.0472)        | (0.0802)           | (0.0502)  | (0.0199)  |
| distance       | -0.0180           | -0.00955  | -0.00158   | -0.0122         | -0.0896**          | -0.0560** | -0.0222** |
|                | (0.0568)          | (0.0295)  | (0.00516)  | (0.0203)        | (0.0345)           | (0.0215)  | (0.00855) |
| Constant       | 2.431***          | 1.398***  | 0.917***   | 0.0110          | -0.0359            | -0.0224   | 0.491***  |
|                | (0.133)           | (0.0676)  | (0.0116)   | (0.0454)        | (0.0771)           | (0.0482)  | (0.0191)  |
| <i>N</i>       | 3,587             | 3,587     | 3,587      | 3,587           | 3,587              | 3,587     | 3,587     |
| (Pseudo) $R^2$ | 0.015             | 0.015     | 0.010      | 0.002           | 0.005              | 0.005     | 0.007     |

*Note.* The dummy variables *pro\_P* and *pac\_T* were dropped due to multicollinearity.

Standard errors are given in parentheses.

\*\*\*  $p < 0.001$ , \*\*  $p < 0.01$ , \*  $p < 0.05$

**Table EC.11 Robustness Checks**

|                                           | Excluding Nonresponses |                  |            |               | Excluding Hang-ups |           |                 |            | Alter. Measure |
|-------------------------------------------|------------------------|------------------|------------|---------------|--------------------|-----------|-----------------|------------|----------------|
|                                           | <i>length</i>          | <i>intention</i> |            | <i>length</i> | <i>intention</i>   |           | <i>duration</i> |            |                |
|                                           | OLS                    | Logit            | Probit     | OLS           | OLS                | Logit     | Probit          | OLS        |                |
| Treatment 1:                              | 0.0851*                | 0.305***         | 0.190***   | 0.0754***     | 0.0713             | 0.249**   | 0.155**         | 0.0603**   | 0.0496         |
| Chatbot Identity Disclosure               | (0.0396)               | (0.0755)         | (0.0472)   | (0.0186)      | (0.0470)           | (0.0846)  | (0.0526)        | (0.0199)   | (0.0329)       |
| Treatment 2:                              | 0.0131                 | 0.339***         | 0.212***   | 0.0840***     | -0.00393           | 0.336***  | 0.209***        | 0.0809***  | 0.131***       |
| Interjections                             | (0.0374)               | (0.0714)         | (0.0446)   | (0.0175)      | (0.0447)           | (0.0808)  | (0.0501)        | (0.0189)   | (0.0328)       |
| Treatment 3:                              | 0.0847*                | 0.729***         | 0.455***   | 0.179***      | 0.0602             | 0.730***  | 0.449***        | 0.167***   | 0.342***       |
| Fillers                                   | (0.0375)               | (0.0725)         | (0.0450)   | (0.0176)      | (0.0443)           | (0.0829)  | (0.0507)        | (0.0187)   | (0.0330)       |
| Treatment 4:                              | 0.0952*                | 0.445***         | 0.278***   | 0.110***      | 0.0706             | 0.341***  | 0.212***        | 0.0819***  | 0.379***       |
| Interjections, Fillers                    | (0.0373)               | (0.0713)         | (0.0445)   | (0.0175)      | (0.0440)           | (0.0796)  | (0.0494)        | (0.0186)   | (0.0328)       |
| Treatment 5:                              | 0.0730                 | 0.663***         | 0.414***   | 0.163***      | 0.0291             | 0.535***  | 0.331***        | 0.126***   | 0.394***       |
| Interjections, Fillers,<br>and Disclosure | (0.0377)               | (0.0726)         | (0.0452)   | (0.0177)      | (0.0442)           | (0.0811)  | (0.0500)        | (0.0187)   | (0.0327)       |
| hist_call                                 | -0.0130                | -0.0477*         | -0.0295*   | -0.0117*      | -0.00376           | 0.00206   | 0.00100         | 0.000522   | -0.0461***     |
|                                           | (0.0116)               | (0.0222)         | (0.0137)   | (0.00542)     | (0.0138)           | (0.0257)  | (0.0158)        | (0.00582)  | (0.01000)      |
| flat                                      | 0.0204                 | 0.108            | 0.0679     | 0.0262        | 0.0262             | 0.139     | 0.0856          | 0.0305     | 0.109**        |
|                                           | (0.0388)               | (0.0749)         | (0.0466)   | (0.0182)      | (0.0453)           | (0.0859)  | (0.0524)        | (0.0191)   | (0.0339)       |
| van                                       | 0.145**                | 0.167            | 0.105      | 0.0412        | 0.154*             | 0.118     | 0.0729          | 0.0275     | -0.00177       |
|                                           | (0.0541)               | (0.104)          | (0.0646)   | (0.0254)      | (0.0639)           | (0.117)   | (0.0723)        | (0.0270)   | (0.0470)       |
| low                                       | 0.0106                 | 0.0699           | 0.0445     | 0.0169        | 0.0216             | 0.150     | 0.0944          | 0.0329     | 0.0640         |
|                                           | (0.0536)               | (0.103)          | (0.0645)   | (0.0251)      | (0.0630)           | (0.120)   | (0.0730)        | (0.0266)   | (0.0465)       |
| truck_size                                | -0.0281                | 0.0325           | 0.0201     | 0.00792       | -0.0395*           | 0.0145    | 0.00890         | 0.00334    | 0.0397**       |
|                                           | (0.0171)               | (0.0328)         | (0.0205)   | (0.00802)     | (0.0199)           | (0.0367)  | (0.0226)        | (0.00840)  | (0.0150)       |
| pro_F                                     | -0.00256               | -0.0379          | -0.0234    | -0.00926      | 0.000261           | -0.0512   | -0.0319         | -0.0118    | 0.0587         |
|                                           | (0.0506)               | (0.0972)         | (0.0606)   | (0.0237)      | (0.0583)           | (0.107)   | (0.0662)        | (0.0246)   | (0.0449)       |
| prod_weight                               | 0.0508*                | 0.105*           | 0.0653*    | 0.0257*       | 0.0517             | 0.0867    | 0.0532          | 0.0201     | -0.00785       |
|                                           | (0.0258)               | (0.0495)         | (0.0309)   | (0.0121)      | (0.0305)           | (0.0559)  | (0.0345)        | (0.0129)   | (0.0225)       |
| distance                                  | -0.0112                | -0.0843***       | -0.0525*** | -0.0206***    | -0.00854           | -0.0790** | -0.0484**       | -0.0182*** | -0.0354***     |
|                                           | (0.0112)               | (0.0216)         | (0.0134)   | (0.00526)     | (0.0130)           | (0.0240)  | (0.0148)        | (0.00550)  | (0.00978)      |
| Constant                                  | -0.0443                | -0.334***        | -0.209***  | 0.418***      | 0.0529             | 0.141*    | 0.0887*         | 0.536***   | -0.233***      |
|                                           | (0.0330)               | (0.0634)         | (0.0395)   | (0.0155)      | (0.0396)           | (0.0711)  | (0.0443)        | (0.0167)   | (0.0286)       |
| <i>N</i>                                  | 9,328                  | 9,328            | 9,328      | 9,328         | 7,861              | 7,861     | 7,861           | 7,861      | 10,703         |
| (Pseudo) <i>R</i> <sup>2</sup>            | 0.003                  | 0.014            | 0.014      | 0.019         | 0.002              | 0.011     | 0.012           | 0.015      | 0.033          |

*Note.* The dummy variables *pro\_P* and *pac\_T* were dropped due to multicollinearity.

Standard errors in parentheses.

\*\*\*  $p < 0.001$ , \*\*  $p < 0.01$ , \*  $p < 0.05$

**Table EC.12 Robustness Check on Alternative Intention Measures**

|                                           | <i>HighIntention</i> |           |           | <i>MidIntention</i> |           |           | <i>LowIntention</i> |            |            |
|-------------------------------------------|----------------------|-----------|-----------|---------------------|-----------|-----------|---------------------|------------|------------|
|                                           | Logit                | Probit    | LPM       | Logit               | Probit    | LPM       | Logit               | Probit     | LPM        |
| Treatment 1:                              | -0.0201              | -0.0100   | -0.000846 | 0.125               | 0.0697    | 0.0153    | -0.00375            | -0.00224   | -0.000590  |
| Chatbot Identity Disclosure               | (0.220)              | (0.0971)  | (0.00855) | (0.112)             | (0.0609)  | (0.0166)  | (0.0797)            | (0.0477)   | (0.0168)   |
| Treatment 2:                              | 0.0370               | 0.0113    | 0.00128   | 0.867***            | 0.492***  | 0.135***  | 0.201*              | 0.121*     | 0.0422*    |
| Interjections                             | (0.226)              | (0.100)   | (0.00889) | (0.102)             | (0.0573)  | (0.0166)  | (0.0797)            | (0.0482)   | (0.0171)   |
| Treatment 3:                              | 0.645**              | 0.293**   | 0.0311*** | 1.275***            | 0.738***  | 0.222***  | 0.562***            | 0.343***   | 0.126***   |
| Fillers                                   | (0.208)              | (0.0959)  | (0.00940) | (0.101)             | (0.0575)  | (0.0171)  | (0.0798)            | (0.0487)   | (0.0176)   |
| Treatment 4:                              | 0.163                | 0.0701    | 0.00624   | 1.044***            | 0.598***  | 0.171***  | 0.294***            | 0.178***   | 0.0628***  |
| Interjections and Fillers                 | (0.223)              | (0.0998)  | (0.00905) | (0.101)             | (0.0570)  | (0.0167)  | (0.0800)            | (0.0485)   | (0.0173)   |
| Treatment 5:                              | 0.316                | 0.140     | 0.0131    | 1.031***            | 0.589***  | 0.168***  | 0.419***            | 0.254***   | 0.0915***  |
| Interjections, Fillers,<br>and Disclosure | (0.216)              | (0.0976)  | (0.00907) | (0.102)             | (0.0573)  | (0.0168)  | (0.0787)            | (0.0479)   | (0.0172)   |
| hist_call                                 | 0.0274               | 0.0120    | 0.00115   | -0.108**            | -0.0548** | -0.0165** | -0.0505*            | -0.0297*   | -0.0109*   |
|                                           | (0.0642)             | (0.0292)  | (0.00281) | (0.0336)            | (0.0178)  | (0.00520) | (0.0250)            | (0.0148)   | (0.00530)  |
| flat                                      | 0.427                | 0.184     | 0.0181    | 0.0820              | 0.0542    | 0.0151    | 0.153               | 0.0939     | 0.0352     |
|                                           | (0.219)              | (0.101)   | (0.00977) | (0.0992)            | (0.0582)  | (0.0179)  | (0.0802)            | (0.0494)   | (0.0180)   |
| van                                       | -0.528               | -0.246    | -0.0234   | -0.0375             | -0.0155   | -0.00642  | 0.388**             | 0.231**    | 0.0790**   |
|                                           | (0.292)              | (0.134)   | (0.0128)  | (0.132)             | (0.0771)  | (0.0235)  | (0.120)             | (0.0717)   | (0.0251)   |
| low                                       | 0.273                | 0.120     | 0.0105    | 0.105               | 0.0580    | 0.0193    | 0.0313              | 0.0185     | 0.00726    |
|                                           | (0.320)              | (0.144)   | (0.0133)  | (0.133)             | (0.0787)  | (0.0241)  | (0.111)             | (0.0683)   | (0.0248)   |
| truck_size                                | 0.142                | 0.0649    | 0.00613   | 0.0827*             | 0.0467    | 0.0152*   | 0.0148              | 0.00979    | 0.00376    |
|                                           | (0.0983)             | (0.0447)  | (0.00420) | (0.0418)            | (0.0247)  | (0.00765) | (0.0366)            | (0.0223)   | (0.00802)  |
| pro_F                                     | 0.222                | 0.104     | 0.0113    | 0.0452              | 0.0239    | 0.00843   | -0.0763             | -0.0460    | -0.0170    |
|                                           | (0.269)              | (0.126)   | (0.0128)  | (0.122)             | (0.0730)  | (0.0229)  | (0.111)             | (0.0678)   | (0.0244)   |
| prod_weight                               | -0.372**             | -0.169**  | -0.0159** | -0.0458             | -0.0282   | -0.00880  | 0.222***            | 0.133***   | 0.0457***  |
|                                           | (0.141)              | (0.0644)  | (0.00616) | (0.0631)            | (0.0370)  | (0.0113)  | (0.0570)            | (0.0342)   | (0.0120)   |
| distance                                  | -0.00405             | -0.00118  | -0.000185 | -0.0723**           | -0.0402*  | -0.0128** | -0.0906***          | -0.0552*** | -0.0197*** |
|                                           | (0.0655)             | (0.0299)  | (0.00275) | (0.0280)            | (0.0162)  | (0.00498) | (0.0242)            | (0.0146)   | (0.00523)  |
| Constant                                  | -3.163***            | -1.736*** | 0.0423*** | -1.871***           | -1.111*** | 0.134***  | -1.077***           | -0.661***  | 0.254***   |
|                                           | (0.185)              | (0.0828)  | (0.00756) | (0.0937)            | (0.0516)  | (0.0145)  | (0.0708)            | (0.0422)   | (0.0148)   |
| <i>N</i>                                  | 5,949                | 5,949     | 5,949     | 7,584               | 7,584     | 7,584     | 8,538               | 8,538      | 8,538      |
| (Pseudo) <i>R</i> <sup>2</sup>            | 0.012                | 0.012     | 0.005     | 0.038               | 0.038     | 0.040     | 0.013               | 0.013      | 0.016      |

*Note.* The dummy variables *pro\_P* and *pac\_T* were dropped due to multicollinearity.

Standard errors are given in parentheses.

\*\*\*  $p < 0.001$ , \*\*  $p < 0.01$ , \*  $p < 0.05$

**Table EC.13** Robustness Check to Rule Out the “Novelty” Effect

|                                                           | <i>response</i>      |                       |                       | <i>length</i>        | <i>intention</i>       |                        |                         |
|-----------------------------------------------------------|----------------------|-----------------------|-----------------------|----------------------|------------------------|------------------------|-------------------------|
|                                                           | Logit                | Probit                | LPM                   | OLS                  | Logit                  | Probit                 | LPM                     |
| Treatment 1:<br>Chatbot Identity Disclosure               | -0.766***<br>(0.104) | -0.432***<br>(0.0580) | -0.113***<br>(0.0125) | 0.0198<br>(0.0391)   | -0.00361<br>(0.0807)   | -0.00181<br>(0.0499)   | -0.000782<br>(0.0193)   |
| Treatment 2:<br>Interjections                             | 0.468***<br>(0.128)  | 0.241***<br>(0.0659)  | 0.0446***<br>(0.0124) | 0.0213<br>(0.0389)   | 0.433***<br>(0.0791)   | 0.270***<br>(0.0492)   | 0.105***<br>(0.0192)    |
| Treatment 3:<br>Fillers                                   | 0.709***<br>(0.137)  | 0.361***<br>(0.0688)  | 0.0613***<br>(0.0125) | 0.0991*<br>(0.0389)  | 0.858***<br>(0.0800)   | 0.535***<br>(0.0496)   | 0.210***<br>(0.0192)    |
| Treatment 4:<br>Interjections and Fillers                 | 0.642***<br>(0.133)  | 0.324***<br>(0.0675)  | 0.0571***<br>(0.0124) | 0.105**<br>(0.0387)  | 0.499***<br>(0.0788)   | 0.311***<br>(0.0490)   | 0.122***<br>(0.0191)    |
| Treatment 5:<br>Interjections, Fillers,<br>and Disclosure | 0.0622<br>(0.116)    | 0.0324<br>(0.0620)    | 0.00689<br>(0.0124)   | 0.0578<br>(0.0386)   | 0.584***<br>(0.0787)   | 0.364***<br>(0.0489)   | 0.143***<br>(0.0190)    |
| hist_call                                                 | -0.0465<br>(0.0416)  | -0.0228<br>(0.0208)   | -0.00418<br>(0.00364) | -0.00899<br>(0.0114) | -0.0888***<br>(0.0246) | -0.0550***<br>(0.0149) | -0.0208***<br>(0.00560) |
| flat                                                      | 0.115<br>(0.139)     | 0.0636<br>(0.0735)    | 0.0117<br>(0.0140)    | 0.0140<br>(0.0438)   | 0.0766<br>(0.0889)     | 0.0481<br>(0.0553)     | 0.0187<br>(0.0216)      |
| van                                                       | 0.0132<br>(0.157)    | 0.00743<br>(0.0843)   | 0.00216<br>(0.0166)   | 0.130*<br>(0.0520)   | 0.175<br>(0.106)       | 0.109<br>(0.0661)      | 0.0421<br>(0.0256)      |
| low                                                       | -0.113<br>(0.170)    | -0.0554<br>(0.0923)   | -0.0127<br>(0.0184)   | -0.0167<br>(0.0574)  | 0.0157<br>(0.116)      | 0.0102<br>(0.0728)     | 0.00385<br>(0.0283)     |
| truck_size                                                | 0.0990<br>(0.0555)   | 0.0525<br>(0.0293)    | 0.00972<br>(0.00558)  | -0.0196<br>(0.0174)  | 0.0488<br>(0.0355)     | 0.0303<br>(0.0221)     | 0.0119<br>(0.00860)     |
| pro_F                                                     | 0.170<br>(0.169)     | 0.0807<br>(0.0866)    | 0.0150<br>(0.0156)    | 0.0143<br>(0.0489)   | 0.0332<br>(0.0991)     | 0.0207<br>(0.0618)     | 0.00806<br>(0.0241)     |
| prod_weight                                               | -0.0341<br>(0.0800)  | -0.0190<br>(0.0428)   | -0.00283<br>(0.00839) | 0.0499<br>(0.0262)   | 0.128*<br>(0.0535)     | 0.0792*<br>(0.0332)    | 0.0308*<br>(0.0129)     |
| distance                                                  | -0.0206<br>(0.0360)  | -0.0120<br>(0.0191)   | -0.00219<br>(0.00373) | -0.0102<br>(0.0117)  | -0.0798***<br>(0.0239) | -0.0492***<br>(0.0148) | -0.0193***<br>(0.00575) |
| Constant                                                  | 1.883***<br>(0.107)  | 1.117***<br>(0.0575)  | 0.867***<br>(0.0114)  | -0.109**<br>(0.0357) | -0.561***<br>(0.0736)  | -0.350***<br>(0.0455)  | 0.363***<br>(0.0176)    |
| <i>N</i>                                                  | 7,853                | 7,853                 | 7,853                 | 7,853                | 7,853                  | 7,853                  | 7,853                   |
| (Pseudo) $R^2$                                            | 0.043                | 0.043                 | 0.035                 | 0.003                | 0.022                  | 0.022                  | 0.029                   |

*Note.* The dummy variables *pro\_P* and *pac\_T* were dropped due to multicollinearity.

Standard errors are given in parentheses.

\*\*\*  $p < 0.001$ , \*\*  $p < 0.01$ , \*  $p < 0.05$

**Table EC.14 Robustness Check on the Impact of Distance**

|                                           | <i>response</i> |           |            | <i>length</i> | <i>intention</i> |           |           |
|-------------------------------------------|-----------------|-----------|------------|---------------|------------------|-----------|-----------|
|                                           | Logit           | Probit    | LPM        | OLS           | Logit            | Probit    | LPM       |
| Treatment 1:                              | -0.708***       | -0.404*** | -0.111***  | 0.0123        | 0.0338           | 0.0210    | 0.00770   |
| Chatbot Identity Disclosure               | (0.0861)        | (0.0486)  | (0.0110)   | (0.0334)      | (0.0692)         | (0.0427)  | (0.0165)  |
| Treatment 2:                              | 0.544***        | 0.284***  | 0.0556***  | 0.0374        | 0.417***         | 0.259***  | 0.101***  |
| Interjections                             | (0.106)         | (0.0553)  | (0.0109)   | (0.0333)      | (0.0680)         | (0.0422)  | (0.0164)  |
| Treatment 3:                              | 0.769***        | 0.397***  | 0.0725***  | 0.112***      | 0.808***         | 0.504***  | 0.197***  |
| Fillers                                   | (0.114)         | (0.0578)  | (0.0110)   | (0.0335)      | (0.0687)         | (0.0426)  | (0.0165)  |
| Treatment 4:                              | 0.769***        | 0.394***  | 0.0727***  | 0.121***      | 0.549***         | 0.342***  | 0.133***  |
| Interjections and Fillers                 | (0.113)         | (0.0573)  | (0.0109)   | (0.0333)      | (0.0680)         | (0.0423)  | (0.0164)  |
| Treatment 5:                              | 0.143           | 0.0766    | 0.0173     | 0.0728*       | 0.617***         | 0.384***  | 0.150***  |
| Interjections, Fillers,<br>and Disclosure | (0.0967)        | (0.0522)  | (0.0109)   | (0.0332)      | (0.0678)         | (0.0421)  | (0.0164)  |
| Treatment 1*distance                      | -0.0593         | -0.0319   | -0.00602   | 0.0187        | 0.0937           | 0.0575    | 0.0216    |
|                                           | (0.0878)        | (0.0494)  | (0.0111)   | (0.0337)      | (0.0702)         | (0.0431)  | (0.0166)  |
| Treatment 2*distance                      | -0.198          | -0.103    | -0.0201    | -0.00206      | 0.00163          | 0.000348  | -0.00110  |
|                                           | (0.102)         | (0.0537)  | (0.0109)   | (0.0331)      | (0.0685)         | (0.0423)  | (0.0163)  |
| Treatment 3*distance                      | -0.156          | -0.0806   | -0.0148    | -0.00754      | -0.00362         | -0.00282  | -0.00222  |
|                                           | (0.116)         | (0.0595)  | (0.0112)   | (0.0341)      | (0.0704)         | (0.0435)  | (0.0168)  |
| Treatment 4*distance                      | -0.161          | -0.0843   | -0.0154    | 0.0126        | 0.0222           | 0.0129    | 0.00378   |
|                                           | (0.114)         | (0.0582)  | (0.0111)   | (0.0337)      | (0.0693)         | (0.0429)  | (0.0166)  |
| Treatment 5*distance                      | -0.0631         | -0.0355   | -0.00792   | -0.0198       | -0.00876         | -0.00621  | -0.00378  |
|                                           | (0.0976)        | (0.0524)  | (0.0109)   | (0.0332)      | (0.0683)         | (0.0423)  | (0.0164)  |
| hist_call                                 | -0.0727**       | -0.0404** | -0.00924** | -0.0159       | -0.0614**        | -0.0370** | -0.0146** |
|                                           | (0.0272)        | (0.0154)  | (0.00334)  | (0.0102)      | (0.0212)         | (0.0128)  | (0.00501) |
| flat                                      | 0.199           | 0.103     | 0.0211     | 0.0285        | 0.139*           | 0.0873*   | 0.0340*   |
|                                           | (0.107)         | (0.0571)  | (0.0113)   | (0.0345)      | (0.0699)         | (0.0436)  | (0.0170)  |
| van                                       | 0.0141          | 0.00859   | 0.00196    | 0.126**       | 0.153            | 0.0951    | 0.0367    |
|                                           | (0.143)         | (0.0769)  | (0.0157)   | (0.0477)      | (0.0974)         | (0.0605)  | (0.0235)  |
| low                                       | -0.00620        | -0.00205  | -0.000885  | 0.00911       | 0.0593           | 0.0371    | 0.0145    |
|                                           | (0.140)         | (0.0757)  | (0.0155)   | (0.0472)      | (0.0957)         | (0.0598)  | (0.0233)  |
| truck_size                                | 0.102*          | 0.0549*   | 0.0101*    | -0.0189       | 0.0513           | 0.0318    | 0.0125    |
|                                           | (0.0484)        | (0.0256)  | (0.00500)  | (0.0152)      | (0.0309)         | (0.0192)  | (0.00751) |
| pro_F                                     | 0.111           | 0.0491    | 0.0106     | 0.00294       | -0.0101          | -0.00606  | -0.00255  |
|                                           | (0.155)         | (0.0800)  | (0.0150)   | (0.0456)      | (0.0923)         | (0.0576)  | (0.0225)  |
| prod_weight                               | -0.0713         | -0.0377   | -0.00681   | 0.0404        | 0.0785           | 0.0484    | 0.0188    |
|                                           | (0.0686)        | (0.0370)  | (0.00750)  | (0.0228)      | (0.0466)         | (0.0289)  | (0.0113)  |
| distance                                  | 0.0716          | 0.0395    | 0.00890    | -0.0109       | -0.0960          | -0.0592   | -0.0221   |
|                                           | (0.0688)        | (0.0374)  | (0.00786)  | (0.0239)      | (0.0502)         | (0.0308)  | (0.0118)  |
| Constant                                  | 1.744***        | 1.042***  | 0.850***   | -0.106***     | -0.599***        | -0.373*** | 0.355***  |
|                                           | (0.0841)        | (0.0457)  | (0.00954)  | (0.0290)      | (0.0601)         | (0.0371)  | (0.0143)  |
| <i>N</i>                                  | 10,703          | 10,703    | 10,703     | 10,703        | 10,703           | 10,703    | 10,703    |
| (Pseudo) <i>R</i> <sup>2</sup>            | 0.047           | 0.047     | 0.039      | 0.004         | 0.019            | 0.019     | 0.026     |

*Note.* The dummy variables *pro\_P* and *pac\_T* were dropped due to multicollinearity. Standard errors are given in parentheses.

\*\*\* p<0.001, \*\* p<0.01, \* p<0.05

**Table EC.15** Placebo Test Rejection Rates

| Rejection Rates<br><i>P</i> -value <0.05 |       |
|------------------------------------------|-------|
| Treatment 1:                             | 0.035 |
| Treatment 2:                             | 0.060 |
| Treatment 3:                             | 0.035 |
| Treatment 4:                             | 0.035 |
| Treatment 5:                             | 0.025 |

**Table EC.16** Robustness Check on the Initial Conditions

|                                                           | <i>response</i>      |                       |                       | <i>length</i>       | <i>intention</i>     |                      |                       |
|-----------------------------------------------------------|----------------------|-----------------------|-----------------------|---------------------|----------------------|----------------------|-----------------------|
|                                                           | Logit                | Probit                | LPM                   | OLS                 | Logit                | Probit               | LPM                   |
| Treatment 1*IfExp                                         | -0.853***<br>(0.133) | -0.482***<br>(0.0742) | -0.133***<br>(0.0169) | 0.0322<br>(0.0497)  | -0.130<br>(0.101)    | -0.0825<br>(0.0630)  | -0.0312<br>(0.0244)   |
| Treatment 2*IfExp                                         | 0.581***<br>(0.151)  | 0.305***<br>(0.0804)  | 0.0597***<br>(0.0169) | 0.0653<br>(0.0497)  | 0.152<br>(0.101)     | 0.0949<br>(0.0630)   | 0.0381<br>(0.0244)    |
| Treatment 3*IfExp                                         | 0.794***<br>(0.158)  | 0.417***<br>(0.0825)  | 0.0745***<br>(0.0170) | 0.0935<br>(0.0498)  | 0.487***<br>(0.102)  | 0.303***<br>(0.0634) | 0.120***<br>(0.0245)  |
| Treatment 4*IfExp                                         | 0.796***<br>(0.155)  | 0.410***<br>(0.0812)  | 0.0778***<br>(0.0169) | 0.142**<br>(0.0494) | 0.368***<br>(0.101)  | 0.230***<br>(0.0628) | 0.0914***<br>(0.0243) |
| Treatment 5*IfExp                                         | 0.232<br>(0.142)     | 0.127<br>(0.0772)     | 0.0283<br>(0.0169)    | 0.0844<br>(0.0497)  | 0.420***<br>(0.101)  | 0.263***<br>(0.0631) | 0.104***<br>(0.0244)  |
| Treatment 1:<br>Chatbot Identity Disclosure               | 0.177<br>(0.0938)    | 0.0931<br>(0.0509)    | 0.0211<br>(0.0110)    | 0.0115<br>(0.0322)  | 0.0905<br>(0.0665)   | 0.0577<br>(0.0413)   | 0.0214<br>(0.0158)    |
| Treatment 2:<br>Interjections                             | 0.107<br>(0.0928)    | 0.0580<br>(0.0506)    | 0.0131<br>(0.0110)    | 0.00189<br>(0.0323) | -0.00262<br>(0.0667) | -0.00141<br>(0.0414) | -0.000844<br>(0.0159) |
| Treatment 3:<br>Fillers                                   | 0.114<br>(0.0933)    | 0.0586<br>(0.0508)    | 0.0139<br>(0.0111)    | 0.0504<br>(0.0324)  | 0.0440<br>(0.0668)   | 0.0277<br>(0.0415)   | 0.0105<br>(0.0159)    |
| Treatment 4:<br>Interjections and Fillers                 | 0.0604<br>(0.0916)   | 0.0345<br>(0.0502)    | 0.00739<br>(0.0109)   | 0.0194<br>(0.0321)  | 0.0527<br>(0.0663)   | 0.0329<br>(0.0412)   | 0.0124<br>(0.0158)    |
| Treatment 5:<br>Interjections, Fillers,<br>and Disclosure | 0.0211<br>(0.0915)   | 0.0116<br>(0.0502)    | 0.00274<br>(0.0110)   | 0.00915<br>(0.0323) | 0.0154<br>(0.0666)   | 0.00862<br>(0.0414)  | 0.00353<br>(0.0159)   |
| IfExp                                                     | 0.638<br>(0.702)     | 0.377<br>(0.410)      | 0.101<br>(0.101)      | 0.156<br>(0.298)    | 1.691*<br>(0.791)    | 1.029*<br>(0.443)    | 0.347*<br>(0.146)     |
| Constant                                                  | 1.394<br>(0.889)     | 0.831<br>(0.498)      | 0.773***<br>(0.114)   | -0.437<br>(0.335)   | -2.889**<br>(0.892)  | -1.720***<br>(0.502) | -0.0532<br>(0.164)    |
| Controls                                                  | Yes                  | Yes                   | Yes                   | Yes                 | Yes                  | Yes                  | Yes                   |
| Day Fixed-Effects                                         | Yes                  | Yes                   | Yes                   | Yes                 | Yes                  | Yes                  | Yes                   |
| <i>N</i>                                                  | 19,571               | 19,571                | 19,662                | 19,662              | 19,584               | 19,584               | 19,662                |
| (Pseudo) <i>R</i> <sup>2</sup>                            | 0.036                | 0.036                 | 0.032                 | 0.008               | 0.030                | 0.030                | 0.042                 |

Standard errors are given in parentheses.

\*\*\*  $p < 0.001$ , \*\*  $p < 0.01$ , \*  $p < 0.05$

**Table EC.17 Full Estimation Results on Information Disclosure**

|                                                           | <i>if_dis</i>        |                      |                       | <i>info_dis</i>      |                       |
|-----------------------------------------------------------|----------------------|----------------------|-----------------------|----------------------|-----------------------|
|                                                           | Logit                | Probit               | OLS                   | OLS                  | Possion               |
| Treatment 1:<br>Chatbot Identity Disclosure               | -0.118<br>(0.0671)   | -0.0741<br>(0.0420)  | -0.0294<br>(0.0164)   | -0.0680<br>(0.0616)  | -0.0426<br>(0.0264)   |
| Treatment 2:<br>Interjections                             | 0.0975<br>(0.0671)   | 0.0609<br>(0.0419)   | 0.0240<br>(0.0163)    | -0.0317<br>(0.0613)  | -0.0194<br>(0.0261)   |
| Treatment 3:<br>Fillers                                   | 0.443***<br>(0.0687) | 0.275***<br>(0.0426) | 0.106***<br>(0.0164)  | 0.405***<br>(0.0617) | 0.0220***<br>(0.0248) |
| Treatment 4:<br>Interjections and Fillers                 | 0.354***<br>(0.0680) | 0.220***<br>(0.0423) | 0.0856***<br>(0.0163) | 0.201**<br>(0.0614)  | 0.116***<br>(0.0253)  |
| Treatment 5:<br>Interjections, Fillers,<br>and Disclosure | 0.310***<br>(0.0675) | 0.193***<br>(0.0420) | 0.0752***<br>(0.0163) | 0.207***<br>(0.0612) | 0.118***<br>(0.0251)  |
| hist_call                                                 | -0.0272<br>(0.0206)  | -0.0169<br>(0.0128)  | -0.00657<br>(0.00498) | -0.0141<br>(0.0187)  | -0.00801<br>(0.00775) |
| flat                                                      | 0.00677<br>(0.0706)  | 0.00408<br>(0.0438)  | 0.00158<br>(0.0169)   | 0.0464<br>(0.0636)   | 0.0255<br>(0.0255)    |
| van                                                       | 0.451***<br>(0.0964) | 0.282***<br>(0.0601) | 0.111***<br>(0.0234)  | 0.311***<br>(0.0879) | 0.192***<br>(0.0377)  |
| low                                                       | 0.00386<br>(0.0966)  | 0.00289<br>(0.0600)  | 0.000897<br>(0.0232)  | -0.0232<br>(0.0870)  | -0.0131<br>(0.0355)   |
| truck_size                                                | 0.00779<br>(0.0311)  | 0.00441<br>(0.0193)  | 0.00157<br>(0.00747)  | 0.0133<br>(0.0281)   | 0.00563<br>(0.0114)   |
| pro_F                                                     | -0.128<br>(0.0931)   | -0.0794<br>(0.0578)  | -0.0307<br>(0.0224)   | -0.0774<br>(0.0840)  | -0.0424<br>(0.0340)   |
| prod_weight                                               | 0.225***<br>(0.0463) | 0.141***<br>(0.0288) | 0.0554***<br>(0.0112) | 0.149***<br>(0.0421) | 0.0922***<br>(0.0179) |
| distance                                                  | -0.0289<br>(0.0203)  | -0.0180<br>(0.0126)  | -0.00696<br>(0.00487) | -0.0257<br>(0.0183)  | -0.0147<br>(0.00754)  |
| Constant                                                  | -0.00545<br>(0.0586) | -0.00329<br>(0.0366) | 0.499***<br>(0.0142)  | 1.538***<br>(0.0536) | 0.429***<br>(0.0229)  |
| <i>N</i>                                                  | 10,703               | 10,703               | 10,703                | 10,703               | 10,703                |
| (Pseudo) <i>R</i> <sup>2</sup>                            | 0.011                | 0.011                | 0.015                 | 0.012                | 0.006                 |

*Note.* The dummy variables *pro\_P* and *pac\_T* were dropped due to multicollinearity. Standard errors are given in parentheses.

\*\*\*  $p < 0.001$ , \*\*  $p < 0.01$ , \*  $p < 0.05$
